# Supplementary material for: Prediction of Acute Kidney Injury after Liver Transplantation: Machine Learning Approaches vs. Logistic Regression Model
Source: PubMed Central journal article supplement (PMC6262324; doi:10.3390/jcm7110428), 2018-11-08
Supplement: jcm-07-00428-s001.pdf [file jcm-07-00428-s001.pdf]

# **Prediction of acute kidney injury after liver transplantation: machine learning approaches vs. logistic regression model**

Hyung-Chul Lee, Soo Bin Yoon, Seong-Mi Yang, Won Ho Kim, Ho-Geol Ryu, Chul-Woo Jung, Kyung-Suk Suh, Kook Hyun Lee

## **Supplemental Digital Contents**

**Supplement Text S1.** Investigated hyperparameters in each model

**Supplemental Text S2.** Python source code for learning the gradient boosting model used in our study.

**Supplemental Table S1.** AKIN (acute kidney injury network) serum creatinine diagnostic criteria of acute kidney injury used in our study.

**Supplemental Table S2.** Results of multivariable logistic regression analysis for acute kidney injury of all stages without stepwise variable selection.

**Supplemental Table S3.** Comparison of area under receiver-operating characteristic curve among the different models to predict stage 2 or 3 acute kidney injury.

**Supplement Text S1.** Investigated hyperparameters in each model

- 1) Gradient boosting machine, Random forest
  - A. Number of estimators: 10, 30, 50, 80, 100, 150, 200
  - B. Maximum depth: 2, 3, 4, 5, 6, 7
- 2) Decision Tree
  - A. Criterion: Gini index, entropy
  - B. Maximum depth: 2, 3, 4, 5, 6, 7
- 3) Support vector machine (linear)
  - A. C: 0.1 step from 0.1 to 2.0
- 4) Support vector machine (radial basis)
  - A. C: 0.5 step from 0.5 to 10
  - B. Log( $\gamma$ ): 0.1 step from -5 to 0
- 5) Multilayer perceptron, Deep belief network
  - A. Number of hidden layers: 2, 3, 4, 5, 6
  - B. Number of nodes in a hidden layer: 8, 10, 12, 16, 32, 64

**Supplemental Text S2.** Python source code for learning the gradient boosting model used in our study.

```
import pandas as pd
import xgboost as xgb
import numpy as np

from sklearn.metrics import confusion_matrix, accuracy_score, roc_curve, roc_auc_score,
f1_score

import random

from scipy.stats import beta

def roc_ci(y_true, y_pred):
    total = len(y_true)
    success = roc_auc_score(y_true, y_pred) * total
    alpha = 0.05
    lower = beta.ppf(alpha / 2, success, total - success + 1)
    upper = beta.ppf(1 - alpha / 2, success + 1, total - success)
    return lower, upper

nfold = 10
param = {'n_estimators': 100, 'depth':5, 'gamma':0.4}

df = pd.read_csv("data.csv")
y = df.values[:, 0] # output variable (0/1) in the first column
X = df.values[:, 1:] # input variables from the second column

nsamp = len(y)
ntest = int(nsamp * 0.3) # 30% of samples are testing dataset
X_test = X[nsamp-ntest:,:]
y_test = y[nsamp-ntest:]
X_trainval = X[:nsamp-ntest,:]
```

```

y_trainval = y[:nsamp-ntest]

print('{} training, {} testing'.format(nsamp - ntest, ntest))

ntrainval = len(y_trainval)
idx = np.arange(0, ntrainval)
random.shuffle(idx)

aucs = []
models = []
for ifold in range(nfold):
    train_idx = list(idx[:int(ifold * ntrainval / nfold)]) + list(idx[int((1+ifold) * ntrainval /
nfold):])
    val_idx = idx[int(ifold * ntrainval / nfold):int((1+ifold) * ntrainval / nfold)]

    X_train = X_trainval[train_idx,:]
    y_train = y_trainval[train_idx]
    y_val = y_trainval[val_idx]
    X_val = X_trainval[val_idx,:]

    if len(np.unique(y_val)) <= 1:
        continue

    model = xgb.sklearn.XGBClassifier(max_depth=param['depth'],
n_estimators=param['n_estimators'], gamma=param['gamma'])
    model.fit(X_train, y_train)

    y_pred = model.predict_proba(X_val)[:, 1]
    auc = roc_auc_score(y_val, y_pred)
    fpr, tpr, thvals = roc_curve(y_val, y_pred)

```

```

y_pred = y_pred > 0.5
f1 = f1_score(y_val, y_pred)
acc = accuracy_score(y_val, y_pred)
tn, fp, fn, tp = confusion_matrix(y_val, y_pred).ravel()

print('fold {} \tauc {:.3f} \tacc {:.3f} \tF1 {:.3f} \tTN {} \tfn {} \tTP {}'.format(ifold,
auc, acc, f1, tn, fp, fn, tp))

models.append(model)
aucs.append(auc)

# refit with trainval dat
idx_best = np.argmax(aucs)
print('\nretraining the best model #{} with {} samples'.format(idx_best, len(y_trainval)))
model = models[idx_best]
model.fit(X_trainval, y_trainval)

y_pred = model.predict_proba(X_test)[:, 1].ravel()

# test the final model
auc = roc_auc_score(y_test, y_pred)
lower_bound, upper_bound = roc_ci(y_test, y_pred)
y_pred = y_pred > 0.5
f1 = f1_score(y_test, y_pred)
acc = accuracy_score(y_test, y_pred)
tn, fp, fn, tp = confusion_matrix(y_test, y_pred).ravel()

print('test auc: {:.3f} ({:.3f} - {:.3f}) \tacc: {:.3f} \tf1: {:.3f} \tTN {} \tfn {} \tTP
{}'.format(auc, lower_bound, upper_bound, acc, f1, tn, fp, fn, tp))

```

**Supplemental Table S1.** AKIN (acute kidney injury network) serum creatinine diagnostic criteria of acute kidney injury used in our study.

| KDIGO criteria | Serum creatinine criteria                                                                                                                                                             |
|----------------|---------------------------------------------------------------------------------------------------------------------------------------------------------------------------------------|
| Stage 1        | Increase in sCr by 0.3 mg/dl or increase in sCr to 1.5-1.9 times baseline within postoperative 48 hours                                                                               |
| Stage 2        | Increase in sCr to 2.0-2.9 times baseline within postoperative 48 hours                                                                                                               |
| Stage 3        | Increase in sCr to > 4.0 mg/dl with an acute increase of >0.5 mg/dL or increase in sCr to 3.0 times baseline or initiation of renal replacement therapy within postoperative 48 hours |

sCr = serum creatinine.

**Supplemental Table S2.** Results of multivariable logistic regression analysis for acute kidney injury of all stages without stepwise variable selection.

| Variable                                             | Beta-coefficient | Odds Ratio | 95% CI       | P-value |
|------------------------------------------------------|------------------|------------|--------------|---------|
| Deceased donor                                       | -0.68            | 0.51       | 0.13 - 1.94  | .320    |
| Recipient age (year)                                 | 0.01             | 1.01       | 0.99 - 1.03  | .297    |
| Recipient gender                                     | 0.06             | 1.06       | 0.73 - 1.55  | .752    |
| Body-mass index (kg/m <sup>2</sup> )                 | 0.01             | 1.01       | 0.96 - 1.06  | .805    |
| Hypertension                                         | -0.33            | 0.72       | 0.40 - 1.30  | .273    |
| Diabetes mellitus                                    | 0.03             | 1.03       | 0.59 - 1.80  | .918    |
| Angina pectoris                                      | -0.13            | 0.88       | 0.28 - 2.77  | .828    |
| COPD                                                 | -0.08            | 0.93       | 0.31 - 2.75  | .892    |
| Chronic kidney disease                               | -0.40            | 0.67       | 0.34 - 1.34  | .262    |
| Cerebrovascular accident                             | 0.56             | 1.76       | 0.37 - 8.25  | .476    |
| Pulmonary hypertension                               | -0.70            | 0.50       | 0.09 - 2.90  | .437    |
| MELD score                                           | -0.01            | 0.99       | 0.97 - 1.02  | .442    |
| Child Turcotte Pugh score                            | 0.11             | 1.11       | 1.02 - 1.22  | .018    |
| ABO incompatibility                                  | -0.52            | 0.59       | 0.20 - 1.75  | .345    |
| Left ventricular ejection fraction (%)               | 0.01             | 1.01       | 0.98 - 1.04  | .618    |
| Preoperative hemoglobin (g/dL)                       | -0.08            | 0.93       | 0.84 - 1.03  | .150    |
| Pleural effusion                                     | -0.31            | 0.73       | 0.37 - 1.47  | .379    |
| Alcoholic cirrhosis                                  | 0.01             | 1.01       | 0.58 - 1.77  | .967    |
| Metabolic cause                                      | 0.95             | 2.58       | 0.32 - 21.1  | .377    |
| Cholestatic cirrhosis                                | 0.80             | 1.64       | 0.63 - 4.33  | .313    |
| Acute hepatic failure                                | 0.31             | 1.357      | 0.65 - 2.84  | .417    |
| Preoperative platelet count (per 10 <sup>9</sup> /L) | 0.001            | 1.001      | 0.99 - 1.004 | .774    |
| Preoperative serum sodium (mEq/L)                    | 0.02             | 1.018      | 0.99 - 1.05  | .207    |
| Preoperative serum potassium (mEq/L)                 | -0.10            | .910       | 0.67 - 1.24  | .553    |
| Preoperative serum glucose (mg/dL)                   | 0.001            | 1.001      | 0.99 - 1.004 | .324    |
| History of esophageal varix ligation                 | -0.28            | 0.75       | 0.48 - 1.20  | .232    |
| Portal hypertension                                  | 0.13             | 1.14       | 0.54 - 2.43  | .733    |
| Previous abdominal surgery                           | 0.23             | 1.26       | 0.88 - 1.80  | .213    |
| Preoperative insulin use                             | -0.44            | 0.64       | 0.26 - 1.61  | .345    |
| Preoperative beta-blocker                            | 0.41             | 1.51       | 0.68 - 3.35  | .307    |
| Preoperative diuretics                               | 0.24             | 1.27       | 0.49 - 3.32  | .627    |
| Operation time (hour)                                | 0.35             | 1.42       | 0.94 - 2.13  | .093    |
| Anesthesia time (hour)                               | -0.36            | 0.70       | 0.47 - 1.04  | .080    |
| Cold ischemic time (per 30 min)                      | 0.23             | 1.26       | 1.01 - 1.58  | .045    |
| Warm ischemic time (per 30 min)                      | 0.11             | 1.12       | 0.71 - 1.76  | .635    |
| GRWR less than 0.8                                   | 0.72             | 2.05       | 1.02 - 4.15  | .045    |
| Crystalloid (per 1 L)                                | 0.04             | 1.04       | 0.96 - 1.13  | .312    |
| Colloid (per 500 ml)                                 | 0.25             | 1.28       | 1.08 - 1.52  | .004    |

|                                                           |        |       |             |      |
|-----------------------------------------------------------|--------|-------|-------------|------|
| Intraoperative albumin administration (per 100 ml)        | -0.01  | 0.99  | 0.91 - 1.01 | .895 |
| Red blood cell transfusion (Yes)                          | 0.001  | 1.001 | 0.97 - 1.03 | .960 |
| Mean central venous pressure (mmHg)                       | 0.01   | 1.01  | 0.98 - 1.05 | .495 |
| SvO <sub>2</sub> decrease form baseline (per 10%)         | 0.33   | 1.39  | 1.10 - 1.76 | .006 |
| Estimated blood loss (per weight)                         | 0.05   | 1.05  | 0.89 - 1.23 | .576 |
| Intraoperative Epinephrine bolus dose (per 10 mcg)        | -0.001 | 0.69  | 0.99 - 1.00 | .683 |
| Intraoperative dopamine infusion                          | 0.42   | 1.52  | 0.98 - 2.36 | .060 |
| intraoperative epinephrine infusion                       | -0.37  | 0.69  | 0.23 - 2.09 | .510 |
| Intraoperative norepinephrine infusion                    | 0.06   | 1.06  | 0.44 - 2.55 | .892 |
| Intraoperative continuous renal replacement therapy       | -0.30  | 0.74  | 0.26 - 2.09 | .569 |
| Mean intraoperative femoral arterial pressure (per mmHg)  | -0.01  | 0.99  | 0.98 - 1.01 | .425 |
| Intraoperative mean hemoglobin (g/dL)                     | 0.01   | 1.01  | 0.88 - 1.17 | .881 |
| Intraoperative mean blood glucose (per 10 mg/dL increase) | 0.08   | 1.08  | 1.02 - 1.15 | .011 |
| Constant                                                  | -3.29  | 0.04  |             | .275 |

Multivariable logistic regression analysis was performed using all the variables with  $p < 0.2$  in univariate logistic analysis.

Nagelkerke  $R^2$  statistic was 0.163. Hosmer and Lemeshow goodness of fit test was not significant at 5% (Chi-square = 10.9,  $P=0.207$ ).

COPD = chronic obstructive pulmonary disease; MELD = model for end-stage liver disease; GRWR=graft-recipient body-weight ratio; SvO<sub>2</sub>=mixed venous oxygen saturation.



**Supplemental Table S3.** Comparison of area under receiver-operating characteristic curve among the different models to predict stage 2 or 3 acute kidney injury.

|                                 | Optimal hyperparameter                                     | AUROC<br>(95% CI) | Accuracy | p-value                                                                                                   |
|---------------------------------|------------------------------------------------------------|-------------------|----------|-----------------------------------------------------------------------------------------------------------|
| Logistic regression (LR)        |                                                            | 0.72 (0.67-0.76)  | 0.72     | 0.005 vs GBM<br>0.021 vs RF<br>0.096 vs DT<br>0.545 vs SVM<br>0.239 vs NB<br>0.600 vs MLP<br>0.137 vs DBN |
| Gradient boosting machine (GBM) | Maximum depth=4<br>Number of estimators=50,<br>gamma=0.5   | 0.85 (0.81-0.89)  | 0.96     | 0.488 vs RF<br><0.001 vs DT<br>0.003 vs SVM<br>0.002 vs NB<br>0.010 vs MLP<br><0.001 vs DBN               |
| Random forest (RF)              | Maximum depth=7<br>Number of estimators=50                 | 0.83 (0.78-0.86)  | 0.96     | <0.001 vs DT<br>0.036 vs SVM<br>0.013 vs NB<br>0.031 vs MLP<br><0.001 vs DBN                              |
| Decision tree (DT)              | Maximum depth=5<br>Criterion=Gini index                    | 0.59 (0.53-0.64)  | 0.92     | 0.329 vs SVM<br>0.520 vs NB<br>0.228 vs MLP<br>0.666 vs DBN                                               |
| Support vector machine (SVM)    | Kernel=linear basis<br>C=0.9                               | 0.68 (0.63-0.73)  | 0.70     | 0.673 vs NB<br>0.853 vs MLP<br>0.354 vs DBN                                                               |
| Naive Bayes (NB)                | Model=Gaussian                                             | 0.64 (0.59-0.69)  | 0.81     | 0.511 vs MLP<br>0.808 vs DBN                                                                              |
| Multilayer perceptron (MLP)     | Number of hidden layers=2<br>Number of nodes in a layer=8  | 0.69 (0.64-0.74)  | 0.88     | 0.098 vs DBN                                                                                              |
| Deep belief network (DBN)       | Number of hidden layers=2<br>Number of nodes in a layer=10 | 0.63 (0.57-0.67)  | 0.75     |                                                                                                           |

CI=confidence interval; AUROC=area under receiver operating characteristic curve.
